# Supplementary material for: Association of polycystic ovary syndrome or anovulatory infertility with offspring psychiatric and mild neurodevelopmental disorders: a Finnish population-based cohort study
Source: PubMed Central journal article supplement — Hum Reprod. 2020 Aug 31;35(10):2336–47. doi: 10.1093/humrep/deaa192 (PMC7518708; doi:10.1093/humrep/deaa192), 2020-08-31
Supplement: deaa192_supplementary_table_v.pdf [file deaa192_supplementary_table_v.pdf]

human reproduction SUPPLEMENTARY DATA

**Supplementary Table SV Hazard ratios (95% CI) for offspring psychiatric and mild neurodevelopmental disorders in relation to maternal PCOS and GDM (birth cohort 1996–2014 in Finland).**

|                                         | Any F diagnosis  | Mood disorders   | Anxiety disorders | Eating disorders | Sleeping disorders | Personality disorders | Intellectual disabilities | Specific developmental disorders | Autism spectrum disorders | ADHD and conduct disorders | Tic disorders    | Other behavioral and emotional disorders |
|-----------------------------------------|------------------|------------------|-------------------|------------------|--------------------|-----------------------|---------------------------|----------------------------------|---------------------------|----------------------------|------------------|------------------------------------------|
| No maternal PCOS + no GDM (n = 983 684) | 1.00             | 1.00             | 1.00              | 1.00             | 1.00               | 1.00                  | 1.00                      | 1.00                             | 1.00                      | 1.00                       | 1.00             | 1.00                                     |
| No maternal PCOS + GDM (n = 89 384)     | 1.28 (1.25–1.31) | 1.55 (1.49–1.61) | 1.44 (1.40–1.49)  | 1.23 (1.11–1.36) | 1.14 (1.04–1.24)   | 1.47 (1.29–1.68)      | 1.49 (1.39–1.60)          | 1.52 (1.48–1.57)                 | 1.41 (1.33–1.50)          | 1.55 (1.49–1.61)           | 1.36 (1.24–1.50) | 1.33 (1.28–1.39)                         |
| Maternal PCOS + no GDM (n = 20 916)     | 1.30 (1.25–1.36) | 1.22 (1.14–1.31) | 1.31 (1.23–1.39)  | 1.34 (1.12–1.60) | 1.43 (1.22–1.66)   | 1.12 (0.86–1.46)      | 1.42 (1.24–1.63)          | 1.35 (1.28–1.42)                 | 1.40 (1.24–1.58)          | 1.35 (1.26–1.46)           | 1.40 (1.17–1.68) | 1.46 (1.36–1.57)                         |
| Maternal PCOS + GDM (n = 3764)          | 1.70 (1.53–1.88) | 2.12 (1.79–2.52) | 1.86 (1.59–2.16)  | 1.77 (1.08–2.89) | 1.77 (1.25–2.50)   | 2.23 (1.20–4.16)      | 1.72 (1.24–2.37)          | 1.88 (1.67–2.11)                 | 1.72 (1.29–2.28)          | 2.38 (2.04–2.78)           | 1.90 (1.25–2.88) | 1.97 (1.66–2.33)                         |

The analyses were adjusted for maternal age, mother’s country of birth (Finland or not), mother married at birth (yes/no), maternal smoking (yes/no), parity (0 or ≥ 1), maternal psychiatric disorder (yes/no), maternal purchase of N05 and N06 during pregnancy (yes/no) and maternal systemic inflammatory disease (yes/no). For each outcome, birth cohort 1996–2014 was used and followed up until 2018. Reference group was births to mothers with no maternal PCOS and no GDM (n = 983 684). GDM, gestational diabetes mellitus.
